# Supplementary material for: Zinc for GNAO1 encephalopathy: preclinical profiling and a clinical case
Source: Research Square preprint supplement (doi:10.21203/rs.3.rs-3771723/v1), 2024-01-25

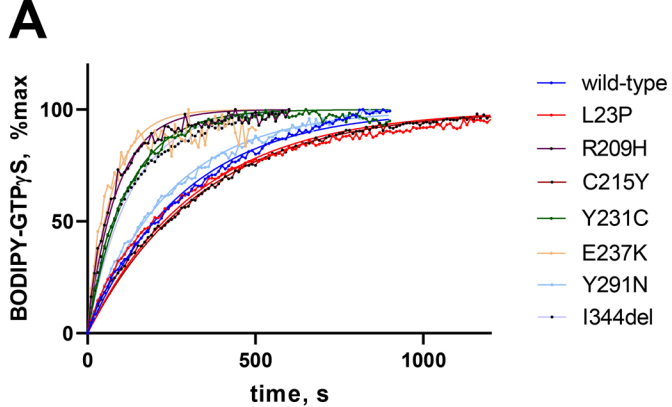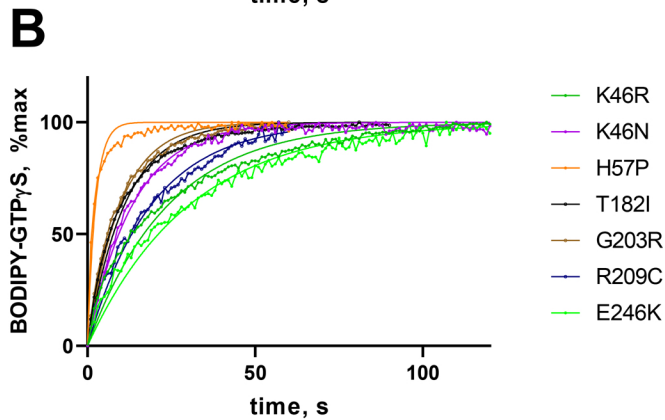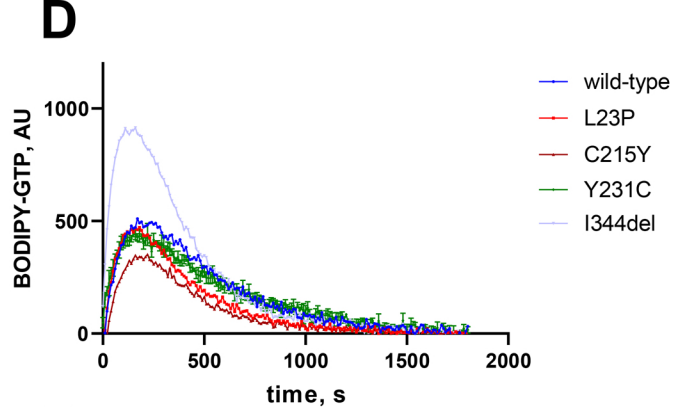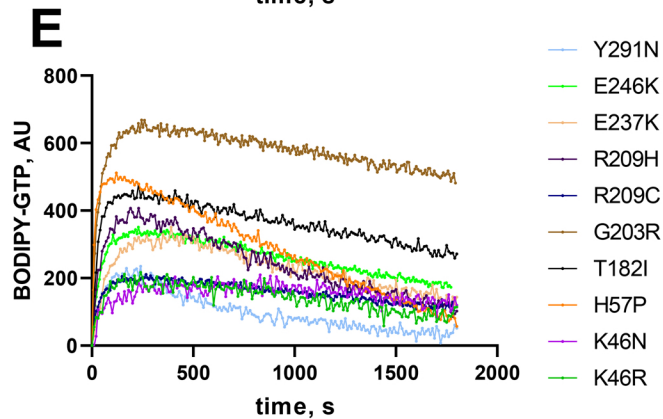

Supplementary Fig. S1

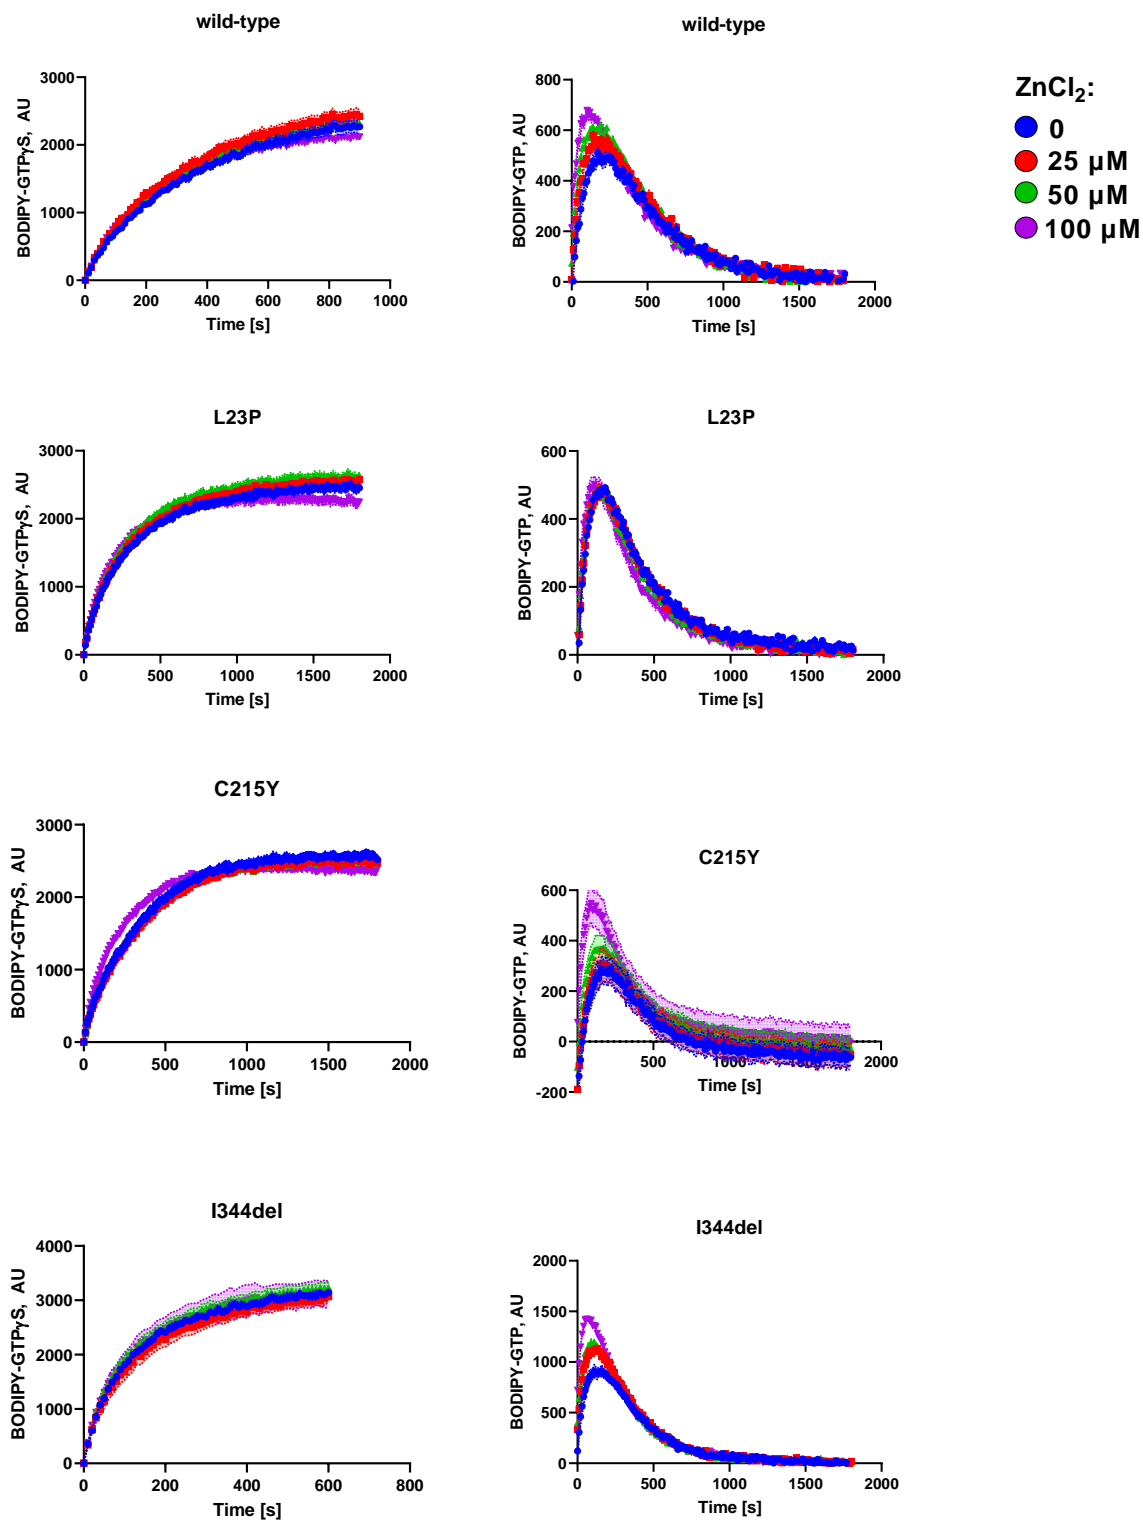

Figure S2

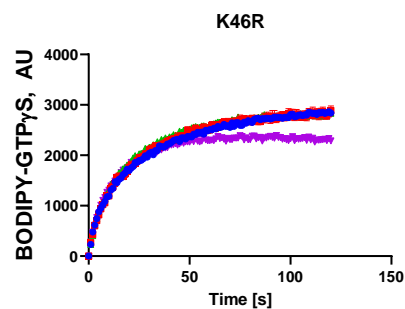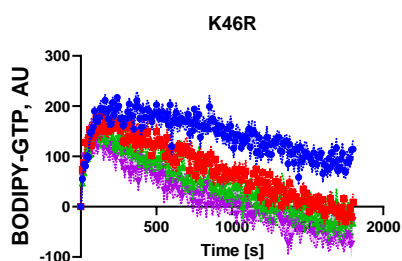

Gao + ZnCl<sub>2</sub>:

- 0
- 25  $\mu$ M
- 50  $\mu$ M
- 100  $\mu$ M

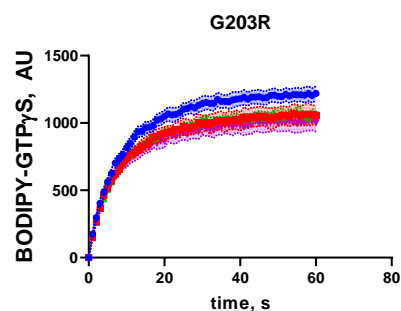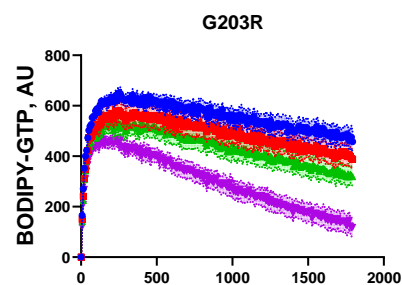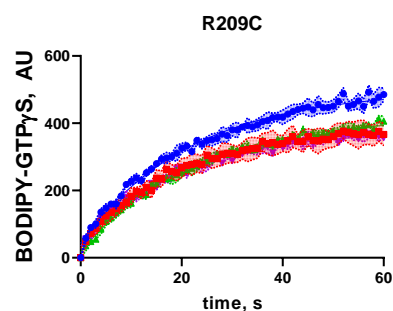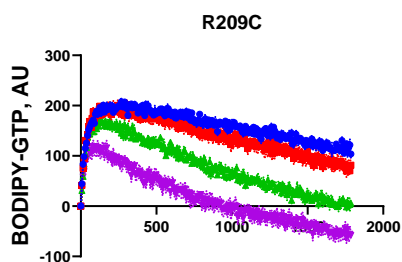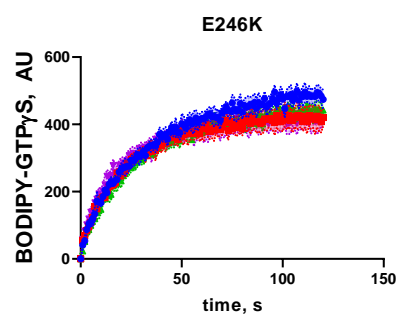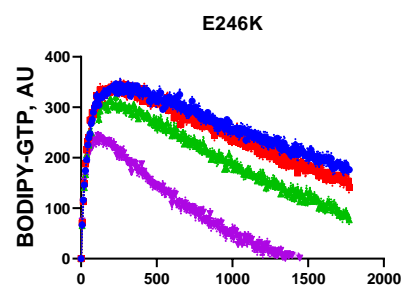

Figure S3

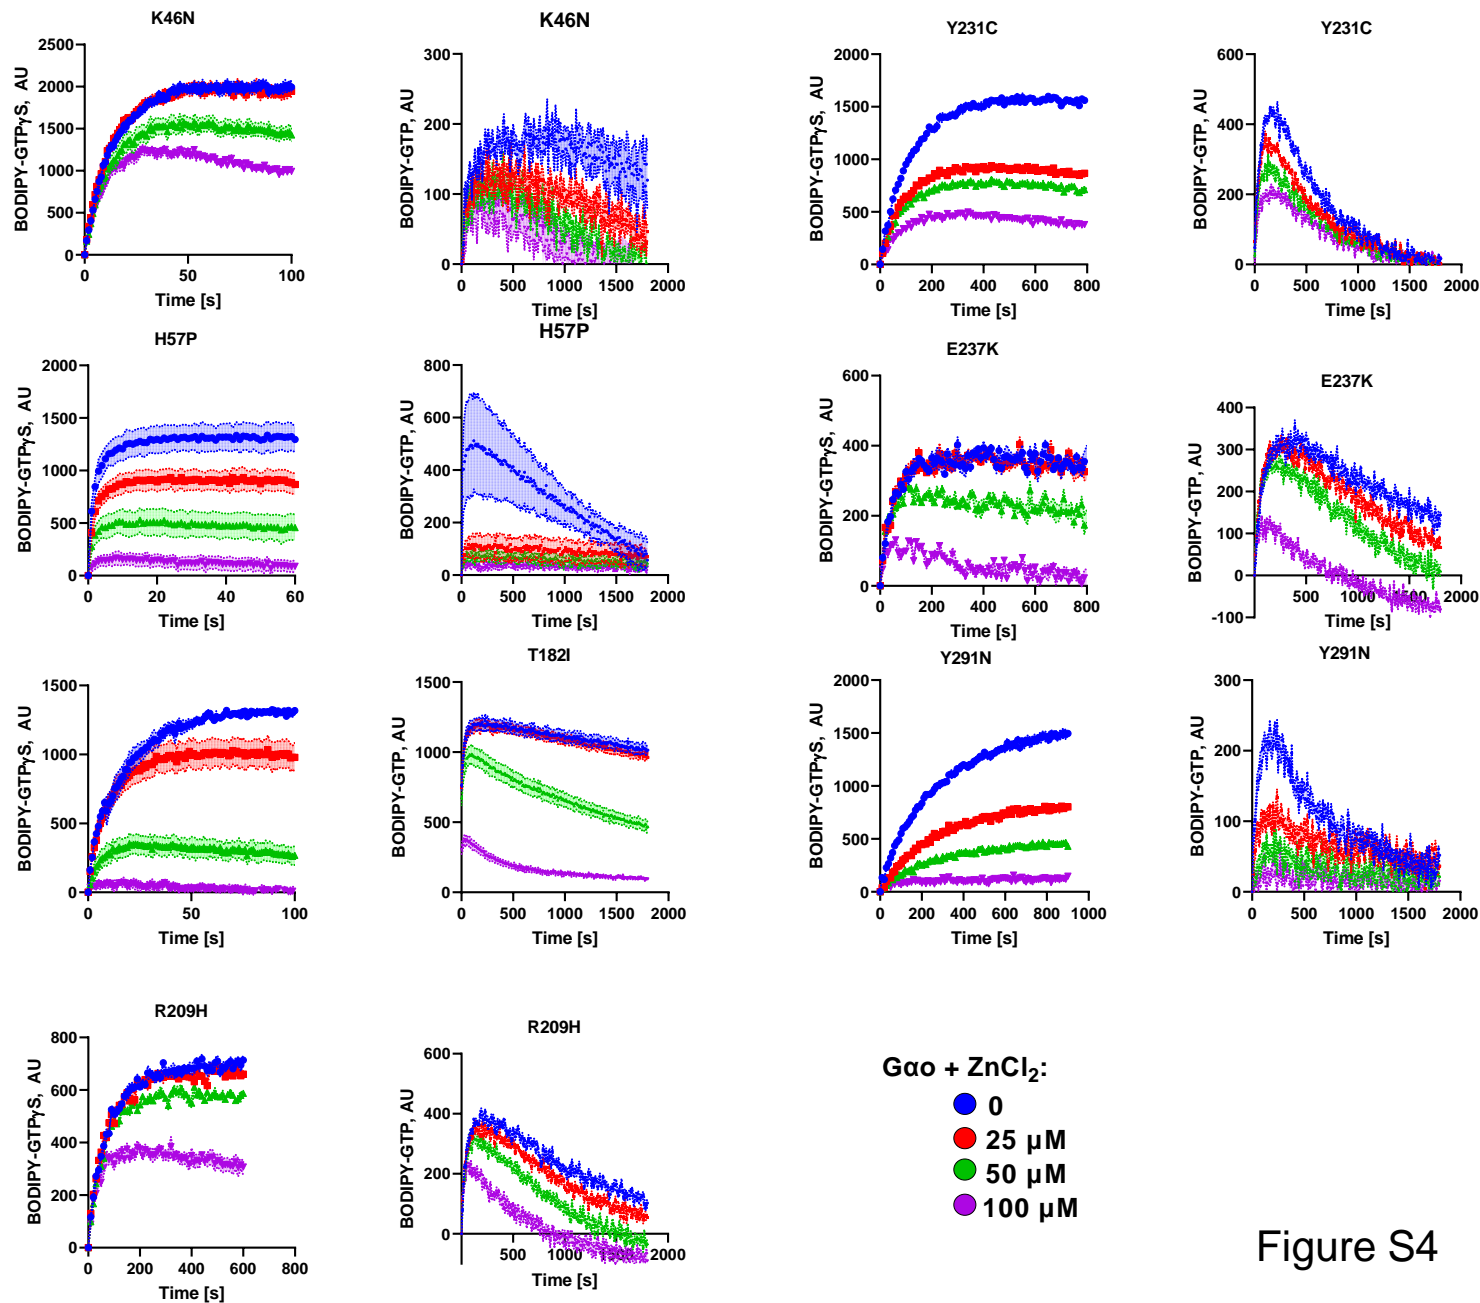



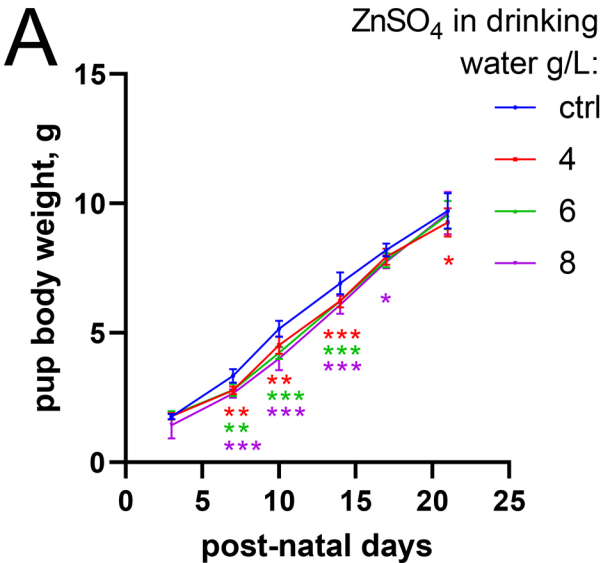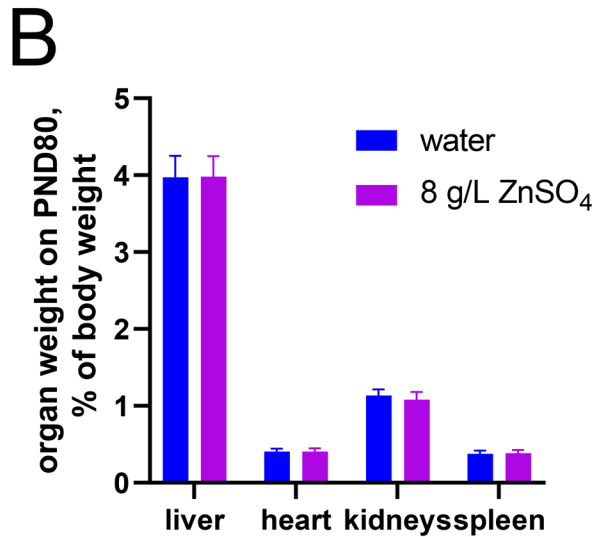

Supplementary Fig. S5

|             | Groups                  | PND              |    |    |    |    |    |    |    |
|-------------|-------------------------|------------------|----|----|----|----|----|----|----|
|             |                         | 21               | 35 | 40 | 45 | 50 | 60 | 70 | 80 |
| Urine       | water                   | Normal (score 0) |    |    |    |    |    |    |    |
|             | 8 g/L ZnSO <sub>4</sub> | Normal (score 0) |    |    |    |    |    |    |    |
| Faeces      | water                   | Normal (score 0) |    |    |    |    |    |    |    |
|             | 8 g/L ZnSO <sub>4</sub> | Normal (score 0) |    |    |    |    |    |    |    |
| Skin        | water                   | Normal (score 0) |    |    |    |    |    |    |    |
|             | 8 g/L ZnSO <sub>4</sub> | Normal (score 0) |    |    |    |    |    |    |    |
| Orifices    | water                   | Normal (score 0) |    |    |    |    |    |    |    |
|             | 8 g/L ZnSO <sub>4</sub> | Normal (score 0) |    |    |    |    |    |    |    |
| Posture     | water                   | Normal (score 0) |    |    |    |    |    |    |    |
|             | 8 g/L ZnSO <sub>4</sub> | Normal (score 0) |    |    |    |    |    |    |    |
| Conscience  | water                   | Normal (score 0) |    |    |    |    |    |    |    |
|             | 8 g/L ZnSO <sub>4</sub> | Normal (score 0) |    |    |    |    |    |    |    |
| Respiration | water                   | Normal (score 0) |    |    |    |    |    |    |    |
|             | 8 g/L ZnSO <sub>4</sub> | Normal (score 0) |    |    |    |    |    |    |    |

|                                                            | Score              |                                                                                   |                                                          |                                                                        |
|------------------------------------------------------------|--------------------|-----------------------------------------------------------------------------------|----------------------------------------------------------|------------------------------------------------------------------------|
| Monitored factor                                           | 0                  | 1                                                                                 | 2                                                        | 3                                                                      |
| Urine                                                      | Normal             | Changes in color and appearance                                                   |                                                          | Severe hematuria, severe incontinence, no urination for period of >24h |
| Faeces                                                     | Normal             | Moist faeces                                                                      | Diarrhea or excessive dryness                            | Severe or bloody diarrhea                                              |
| General condition (skin, orifices, posture and conscience) | All factors normal | Decreased activity, slight abnormalities of posture or activity, aggression, fear | Severe loss of activity, poor grooming, skin dehydration | Near or complete paralysis, cachexia or emaciation                     |
| Respiration                                                | Normal             |                                                                                   | Rapid, shallow or abdominal breathing                    | Severely slowed or obstructed breathing                                |

Figure S6

| Organ(-s)                           | Inspection and comparison criteria                                                                                                                                                                        | Differences between groups? |                                         |
|-------------------------------------|-----------------------------------------------------------------------------------------------------------------------------------------------------------------------------------------------------------|-----------------------------|-----------------------------------------|
|                                     |                                                                                                                                                                                                           | Water, N=4, females         | ZnSO <sub>4</sub> , 8mg/ml N=4, females |
| Skin and cutaneous adnexae          | Presence of lesions, ulcers, tumors or alopecia. The cutaneous adnexae, such as the claws, whiskers, and mammary glands, were inspected for any abnormalities.                                            | None                        | None                                    |
| Skeletal muscles                    | Rear paw skeletal muscles were inspected for presence of masses, edema, or hemorrhage and signs of atrophy, degeneration, or inflammation.                                                                | None                        | None                                    |
| Inguinal and mesenteric lymph nodes | Were evaluated for any changes in size, shape, color, or consistency.                                                                                                                                     | None                        | None                                    |
| Stomach                             | Was examined for any ulcers, erosions, hemorrhages, or foreign bodies. The mucosa is also inspected for any overt signs of hyperplasia, inflammation, or neoplasia.                                       | None                        | None                                    |
| Intestine                           | The intestine was examined for any overt signs of perforations, obstructions, intussusceptions, or parasites. The mucosa is also inspected for any overt signs of hemorrhage, inflammation, or neoplasia. | None                        | None                                    |
| Liver                               | The liver was examined for any changes in size, shape, color, or texture. The lobes were inspected for any overt signs of nodules, cysts, abscesses, or tumors.                                           | None                        | None                                    |
| Pancreas                            | The pancreas was examined for any changes in size, shape, color, or texture, as well as visible nodules, cysts, abscesses, or tumors.                                                                     | None                        | None                                    |
| Spleen                              | The spleen was examined for any changes in size, shape, color, or texture and for presence of any lesions.                                                                                                | None                        | None                                    |
| Kidneys                             | The kidneys were examined for any changes in size, shape, color, or texture, overt signs of lesions, scars, tumors, or inflammation.                                                                      | None                        | None                                    |
| Ureter, bladder, and urethra        | The ureter, bladder, and urethra are examined for any dilatation, obstruction, inflammation, ulceration, or neoplasia.                                                                                    | None                        | None                                    |
| Ovaries and uterus                  | Ovaries and uterus were inspected for overall size and shape and for presence of cysts or tumors.                                                                                                         | None                        | None                                    |
| Lung                                | The lung is examined for any changes in size, shape, color, texture, neoplasia or inflammation at the level of bronchi.                                                                                   | None                        | None                                    |
| Heart and coronary arteries         | The heart is examined for any changes in size, shape, color, or texture. The coronary arteries were also examined for any atherosclerosis, occlusion, or aneurysm.                                        | None                        | None                                    |
| Thymus                              | The thymus is examined for any changes in size, shape, color, or texture. The lobes are also inspected for any involution, hyperplasia, or neoplasia.                                                     | None                        | None                                    |

Figure S7

**A**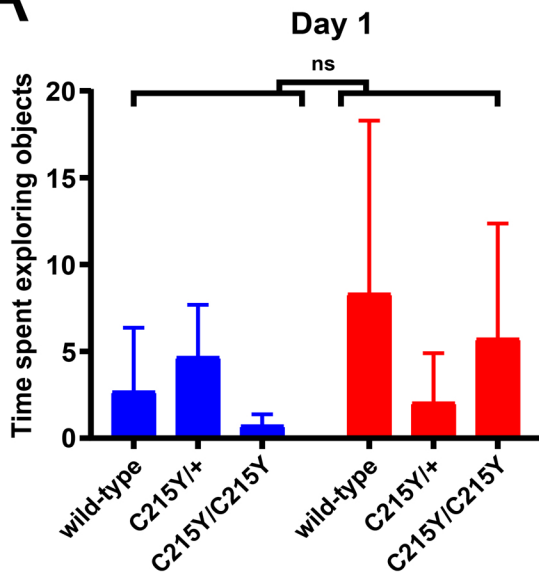**B**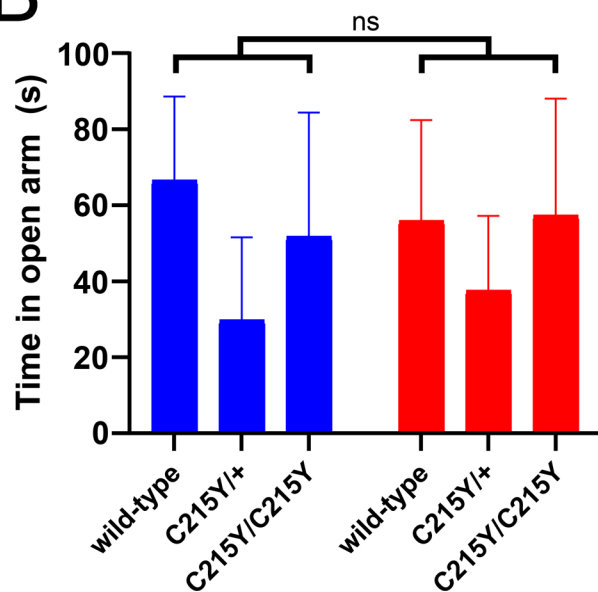**C**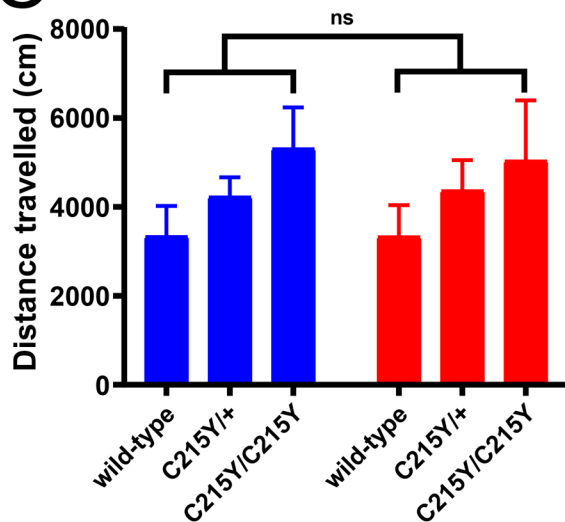**D**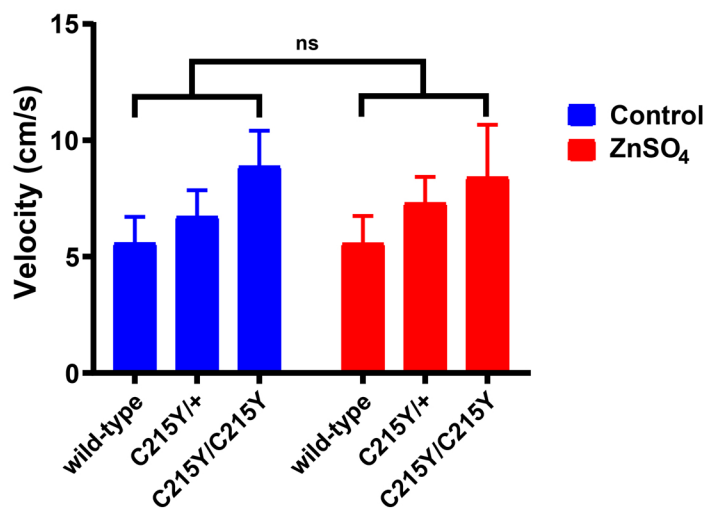

Supplement: Supplementary file 1 [file 0a9b921bf1aa9a35f8ed392e.pdf]
